# Supplementary material
Source: Research Square preprint supplement (doi:10.21203/rs.3.rs-6761555/v1)
Supplement: Supplementary file 1 [file 55ef91d000828f9d30c981f4.docx]

**INTEGRATING TELEMEDICINE INTO HEALTH SYSTEMS: A QUALITATIVE STUDY ON HEALTH WORKFORCE AND INFRASTRUCTURE CAPACITY AT THE ASHANTI REGIONAL SECONDARY LEVEL HOSPITAL, GHANA**

**Interview Guide (SARA Framework-Based)**

**Introduction**
Good morning/afternoon. I am a student at the School of Public Health, KNUST. I am conducting a study on **integrating telemedicine into health systems**, particularly focusing on the **availability of the health workforce and infrastructure capacity**. Your participation will provide valuable insights that could improve the provision and implementation of telemedicine services. All information shared will be treated as confidential, and your identity will not be disclosed in any form. Thank you for your time and cooperation.

**Date of Interview:**
**Interview ID Number:**

**SECTION 1: Background Information**

1. Year the facility was established
2. Number and types of units/departments in the facility
3. Range of health services provided
4. Year teleconsultation/telemedicine was introduced at this facility
5. Participant’s highest educational qualification
6. Current professional designation
7. Current rank/position within the institution
8. Years of experience in the health profession
9. Years worked at this specific facility

**SECTION 2: Service Availability Infrastructure**

1. What type of physical space is designated for teleconsultation services?

- (e.g., room, tent, converted office, dedicated unit)

1. Describe the physical condition of the space used for teleconsultation:

- Size and layout
- Lighting and ventilation
- Accessibility and privacy
- Availability of power supply and backups

1. What hardware and software tools are used for teleconsultation?

- Examples: computers, cameras, microphones, telemedicine platforms

1. What type of internet connectivity is used for teleconsultation?

- Wi-Fi, Ethernet, mobile data
- Reliability and average internet speed

1. How often are the telemedicine systems and devices maintained?

- Is there a regular maintenance schedule?
- Who is responsible for maintenance?

1. What is the current operational status of your telemedicine infrastructure?

- Fully functional, partially functional, or not functional

**SECTION 3: Human Resources For Telemedicine**

1. What categories of staff are required to operate the teleconsultation services?

- Clinicians, IT personnel, administrative staff, etc.
- How many staff members are ideal for efficient operation?
- What criteria are used to determine staffing levels?

1. How many staff members currently work in teleconsultation at your facility?
2. What training or orientation have they received for telemedicine services?

- Type of training (technical, clinical, operational)
- Frequency of in-service or refresher training

**SECTION 4: Service Availability and Future Outlook for Health System Integration**

1. What telemedicine services are currently provided at your facility?

- Specialist consultations, follow-ups, remote monitoring, etc.

1. How has the efficiency or effectiveness of teleconsultation changed over time?

- Compared to when it was first introduced

1. Who are the primary users or target population for your telemedicine services?

- Urban vs rural, chronic illness patients, follow-up care, etc.

1. What essential materials and supplies are needed for telemedicine delivery?

- What items are currently available?
- Which materials are lacking or insufficient?

1. What are the main challenges faced in delivering teleconsultation services?

- Infrastructure, staffing, technical issues, patient-related factors
- How are these challenges addressed?

**SECTION 5: Future Outlook**

1. What are your future plans for strengthening telemedicine services in this facility?

- Improvements in infrastructure and space
- Upgrades to technology and software systems
- Plans for workforce development or recruitment

THANK YOU!
